# Supplementary material
Source: HighWire-hosted journal article supplement (https://erj.ersjournals.com/content/57/3/2002255)
Supplement: inline-supplementary-material-1 [file inline-supplementary-material-1.pdf]

## Appendix.1 Data variables extracted from VeraAsyl (VA), TakeCare (TC) and Hälsoplan (HP)

| <i>Variables extracted</i>                                                                                                                                                                                                                                                                                  | <i>Data source</i> |
|-------------------------------------------------------------------------------------------------------------------------------------------------------------------------------------------------------------------------------------------------------------------------------------------------------------|--------------------|
| ID-number                                                                                                                                                                                                                                                                                                   | VA, TC and HP      |
| Temporary ID-number                                                                                                                                                                                                                                                                                         | VA, TC and HP      |
| Dossier number                                                                                                                                                                                                                                                                                              | VA and TC          |
| Name of primary health care center executing HE                                                                                                                                                                                                                                                             | VA, TC and HP      |
| Date of invitation to HE                                                                                                                                                                                                                                                                                    | VA and HP          |
| Status of HE                                                                                                                                                                                                                                                                                                | VA and HP          |
| Date of executed HE                                                                                                                                                                                                                                                                                         | VA, TC and HP      |
| Region of residency                                                                                                                                                                                                                                                                                         | VA                 |
| Date of moving to the region                                                                                                                                                                                                                                                                                | VA                 |
| Date of asylum application                                                                                                                                                                                                                                                                                  | VA                 |
| Age                                                                                                                                                                                                                                                                                                         | VA and HP          |
| Sex                                                                                                                                                                                                                                                                                                         | VA, TC and HP      |
| Name                                                                                                                                                                                                                                                                                                        | VA, TC and HP      |
| Date of birth                                                                                                                                                                                                                                                                                               | VA and HP          |
| Country of origin                                                                                                                                                                                                                                                                                           | VA and HP          |
| Language                                                                                                                                                                                                                                                                                                    | VA                 |
| Year of birth                                                                                                                                                                                                                                                                                               | TC                 |
| Date of referral to IGRA/TST                                                                                                                                                                                                                                                                                | TC                 |
| Date of executed IGRA/TST                                                                                                                                                                                                                                                                                   | TC                 |
| IGRA/TST results                                                                                                                                                                                                                                                                                            | TC                 |
| Date of referral to chest X-ray                                                                                                                                                                                                                                                                             | TC                 |
| Date of chest X-ray execution                                                                                                                                                                                                                                                                               | TC                 |
| Results of chest X-ray                                                                                                                                                                                                                                                                                      | TC                 |
| Date of referral to TB specialist clinic                                                                                                                                                                                                                                                                    | TC                 |
| Date of visit to the TB specialist clinic                                                                                                                                                                                                                                                                   | TC                 |
| Dates of prescribed medicines through ATC-codes: J04AC01, J02AM02, J04AB02, J04AM06, J01GB06, J01XX08, J04AB05, J01MA14, SO1AE07, J04AA01, J04AA02, J04AA03, J04AB01, J04AB03, J04AB04, J04AB30, J04AC51, J04AD01, J04AD02, J04AD03, J04AK01, J04AK02, J04AK03, J04AK04, J04AM01, J04AM03, J04AM04, J04AM05 | TC                 |

ID=Identity

HE=Health examination

IGRA=Interferon Gamma Release Assay

TST=Tuberculin Skin Test

Chest X-ray=Chest radiograph

TB=Tuberculosis

ATC-codes= The Anatomical Therapeutic Chemical classification codes
