# Supplementary material
Source: HighWire-hosted journal article supplement (https://erj.ersjournals.com/content/57/3/2002255)
Supplement: inline-supplementary-material-2 [file inline-supplementary-material-2.pdf]

**Appendix.2** Univariate and multivariate models for predictors of the completion of each cascade steps of LTBI screening, referral and treatment among a cohort of 14173 asylum seekers who attended a health examination in Stockholm County between January 1st 2015 to December 31st 2018.

| <b>Table A2:1 Odds ratios. with 95% confidence intervals. for being IGRA screened (yes/no) during a health examination.</b> |             |                                 |                          |                             |
|-----------------------------------------------------------------------------------------------------------------------------|-------------|---------------------------------|--------------------------|-----------------------------|
|                                                                                                                             |             | <i>Number screened (n=5467)</i> | <i>Crude OR (95% CI)</i> | <i>Adjusted OR (95% CI)</i> |
| <b>Sex</b>                                                                                                                  | Male        | 4106                            | Reference                | Reference                   |
|                                                                                                                             | Female      | 1364                            | 0.79 (0.74-0.85)         | 1.02 (0.93-1.12)            |
| <b>Age</b>                                                                                                                  | 0-12 years  | 424                             | 0.71 (0.59-0.86)         | 0.51 (0.40-0.65)            |
|                                                                                                                             | 13-19 years | 1936                            | 4.31 (3.61-5.14)         | 1.77 (1.41-2.21)            |
|                                                                                                                             | 20-34 years | 1769                            | 1.13 (0.96-1.34)         | 0.97 (0.98-1.20)            |
|                                                                                                                             | 35-54 years | 1125                            | 1.19 (1.00-1.42)         | 1.05 (0.85-1.31)            |
|                                                                                                                             | 55+ years   | 216                             | Reference                | Reference                   |
|                                                                                                                             |             |                                 |                          |                             |
| <b>TB incidence/100.000 in country of origin</b>                                                                            | <50         | 580                             | 0.06 (0.05-0.07)         | 0.06 (0.05-0.07)            |
|                                                                                                                             | 50-99       | 791                             | 0.19 (0.17-0.22)         | 0.18 (0.15-0.21)            |
|                                                                                                                             | 100-199     | 2585                            | 1.99 (1.7-2.3)           | 1.44 (1.23-1.68)            |
|                                                                                                                             | 200-299     | 741                             | 1.62 (1.35-1.95)         | 1.43 (1.18-1.72)            |
|                                                                                                                             | ≥300        | 773                             | Reference                | Reference                   |
|                                                                                                                             |             |                                 |                          |                             |

\*Odds ratios adjusted for sex, age and TB incidence in country of origin.

IGRA=Interferon Gamma Release Assay

OR=Odds Ratio

CI=Confidence intervals

LTBI=Latent tuberculosis infection

TB=Tuberculosis

**Table A2:2 Odds ratios with 95% confidence intervals for being IGRA positive (yes/no) of those IGRA screened, adjusted by sex, age and TB incidence/100.000 in country of origin**

|                                                  |             | <i>Number IGRA positive<br/>(n=1364)</i> | <i>Crude OR (95% CI)</i> | <i>Adjusted OR (95% CI)</i> |
|--------------------------------------------------|-------------|------------------------------------------|--------------------------|-----------------------------|
| <b>Sex</b>                                       | Male        | 946                                      | Reference                | Reference                   |
|                                                  | Female      | 418                                      | 0.99 (0.86-1.13)         | 0.74 (0.64-0.85)            |
| <b>Age</b>                                       | 0-12 years  | 22                                       | 0.07 (0.04-0.11)         | 0.06 (0.04-0.10)            |
|                                                  | 13-19 years | 377                                      | 0.30 (0.22-0.40)         | 0.26 (0.19-0.36)            |
|                                                  | 20-34 years | 456                                      | 0.43 (0.32-0.57)         | 0.38 (0.28-0.51)            |
|                                                  | 35-54 years | 412                                      | 0.71 (0.53-0.95)         | 0.62 (0.46-0.84)            |
|                                                  | 55+ years   | 97                                       | Reference                | Reference                   |
|                                                  |             |                                          |                          |                             |
| <b>TB incidence/100.000 in country of origin</b> | <50         | 82                                       | 0.31 (0.24-0.41)         | 0.29 (0.22-0.39)            |
|                                                  | 50-99       | 200                                      | 0.65 (0.52-0.80)         | 0.58 (0.46-0.73)            |
|                                                  | 100-199     | 563                                      | 0.53 (0.45-0.63)         | 0.58 (0.47-0.70)            |
|                                                  | 200-299     | 253                                      | 0.99 (0.80-1.22)         | 0.93 (0.75-1.17)            |
|                                                  | ≥300        | 266                                      | Reference                | Reference                   |
|                                                  |             |                                          |                          |                             |

\*Odds ratios adjusted for sex, age and TB incidence in country of origin.

IGRA=Interferon Gamma Release Assay

OR=Odds Ratio

CI=Confidence intervals

TB=Tuberculosis

**Table A2:3 Odds ratios with 95% confidence intervals for being referred to TB specialist clinic (yes/no) after positive IGRA screening, adjusting for sex, age and incidence/100.000 in country of origin**

|                                                      |             | <i>Number referred to TB<br/>specialist clinic (n=604)</i> | <i>Crude OR (95%CI)</i> | <i>Adjusted OR (95%CI)</i> |
|------------------------------------------------------|-------------|------------------------------------------------------------|-------------------------|----------------------------|
| <b>Sex</b>                                           | Male        | 449                                                        | Reference               | Reference                  |
|                                                      | Female      | 155                                                        | 0.65 (0.52-0.83)        | 1.08 (0.83-1.41)           |
| <b>Age</b>                                           | 0-12 years  | 19                                                         | 20.4 (5.53-75.0)        | 23.0 (6.18-85.8)           |
|                                                      | 13-19 years | 275                                                        | 8.67 (5.16-14.6)        | 8.55 (4.99-14.7)           |
|                                                      | 20-34 years | 178                                                        | 2.06 (1.24-3.41)        | 2.25 (1.35-3.75)           |
|                                                      | 35-54 years | 109                                                        | 1.16 (0.69-1.94)        | 1.31 (0.78-2.22)           |
|                                                      | 55+ years   | 23                                                         | Reference               | Reference                  |
|                                                      |             |                                                            |                         |                            |
| <b>TB incidence/100.000 in<br/>country of origin</b> | <50         | 34                                                         | 1.68 (1.00-2.80)        | 1.61 (0.93-2.78)           |
|                                                      | 50-99       | 68                                                         | 1.22 (0.82-1.81)        | 1.04 (0.68-1.52)           |
|                                                      | 100-199     | 307                                                        | 2.84 (2.08-3.87)        | 1.61 (1.13-2.28)           |
|                                                      | 200-299     | 116                                                        | 2.00 (1.40-2.88)        | 1.52 (1.03-2.24)           |
|                                                      | ≥300        | 79                                                         | Reference               | Reference                  |
|                                                      |             |                                                            |                         |                            |

\*Odds ratios adjusted for sex, age and TB incidence in country of origin.

IGRA=Interferon Gamma Release Assay

OR=Odds Ratio

CI=Confidence intervals

TB=Tuberculosis

**Table A2:4 Odds ratios with 95% confidence intervals for TB specialist visit (yes/no) after referral, adjusted for sex, age and TB incidence/100.000 in country of origin**

|                                                      |             | <i>Number visited TB specialist<br/>clinic (n=514)</i> | <i>Crude OR (95%CI)</i> | <i>Adjusted OR (95%CI)</i> |
|------------------------------------------------------|-------------|--------------------------------------------------------|-------------------------|----------------------------|
| <b>Sex</b>                                           | Male        | 389                                                    | Reference               | Reference                  |
|                                                      | Female      | 125                                                    | 0.64 (0.40-1.04)        | 1.20 (0.70-2.04)           |
| <b>Age</b>                                           | 0-12 years  | 15                                                     | 2.00 (0.49-8.09)        | 2.10 (0.50-8.81)           |
|                                                      | 13-19 years | 263                                                    | 11.7 (4.15-32.9)        | 12.2 (4.01-37.2)           |
|                                                      | 20-34 years | 141                                                    | 2.03 (0.80-5.16)        | 2.06 (0.78-5.42)           |
|                                                      | 35-54 years | 80                                                     | 1.47 (0.57-3.83)        | 1.45 (0.54-3.93)           |
|                                                      | 55+ years   | 15                                                     | Reference               | Reference                  |
|                                                      |             |                                                        |                         |                            |
| <b>TB incidence/100.000 in<br/>country of origin</b> | <50         | 27                                                     | 0.98 (0.36-2.65)        | 1.13 (0.40-3.19)           |
|                                                      | 50-99       | 57                                                     | 1.32 (0.56-3.01)        | 1.26 (0.52-3.04)           |
|                                                      | 100-199     | 277                                                    | 2.35 (1.21-4.56)        | 1.03 (0.50-2.14)           |
|                                                      | 200-299     | 90                                                     | 0.88 (0.44-1.77)        | 0.64 (0.31-1.34)           |
|                                                      | ≥300        | 63                                                     | Reference               | Reference                  |
|                                                      |             |                                                        |                         |                            |

\*Odds ratios adjusted for sex, age and TB incidence in country of origin.

IGRA=Interferon Gamma Release Assay

OR=Odds Ratio

CI=Confidence intervals

TB=Tuberculosis

**Table A2:5 Odds ratios with 95% confidence intervals for initiating LTBI treatment (yes/no) after visit to the TB specialist clinic, adjusted for sex, age and TB incidence/100.000 in country of origin**

|                                                      |             | <i>Number initiated treatment<br/>(n=358)</i> | <i>Crude OR (95%CI)</i> | <i>Adjusted OR (95%CI)</i> |
|------------------------------------------------------|-------------|-----------------------------------------------|-------------------------|----------------------------|
| <b>Sex</b>                                           | Male        | 285                                           | Reference               | Reference                  |
|                                                      | Female      | 73                                            | 0.51 (0.34-0.78)        | 1.44 (0.83-2.51)           |
| <b>Age</b>                                           | 0-12 years  | 12                                            | 16.0 (2.67-95.8)        | 21.3 (3.35-135)            |
|                                                      | 13-19 years | 248                                           | 66.1 (16.8-260)         | 68.5 (16.3-287)            |
|                                                      | 20-34 years | 77                                            | 4.81 (1.30-17.8)        | 5.51 (1.44-21.2)           |
|                                                      | 35-54 years | 18                                            | 1.16 (0.30-4.57)        | 1.58 (0.39-6.48)           |
|                                                      | 55+ years   | 3                                             | Reference               | Reference                  |
|                                                      |             |                                               |                         |                            |
| <b>TB incidence/100.000 in<br/>country of origin</b> | <50         | 11                                            | 0.81 (0.32-2.01)        | 0.88 (0.31-2.54)           |
|                                                      | 50-99       | 22                                            | 0.74 (0.36-1.53)        | 0.51 (0.21-1.25)           |
|                                                      | 100-199     | 234                                           | 6.38 (3.53-11.54)       | 1.86 (0.91-3.83)           |
|                                                      | 200-299     | 62                                            | 2.60 (1.33-5.06)        | 1.61 (0.74-3.52)           |
|                                                      | ≥300        | 29                                            | Reference               | Reference                  |
|                                                      |             |                                               |                         |                            |

\*Odds ratios adjusted for sex, age and TB incidence in country of origin.

IGRA=Interferon Gamma Release Assay

OR=Odds Ratio

CI=Confidence intervals

TB=Tuberculosis

LTBI=Latent tuberculosis infection
