# Supplementary material
Source: HighWire-hosted journal article supplement (https://erj.ersjournals.com/content/57/3/2002255)
Supplement: inline-supplementary-material-3 [file inline-supplementary-material-3.pdf]

**Appendix.3** Presence of epidemiological and/or biological risk factors for active TB among asylum seekers tested by IGRA at a health examination. A review of 443 medical records within specialist care in Stockholm County January 1st 2016 to December 31st 2017.

|                                                      | Referred to<br>TB<br>specialist<br>clinic | Exclusively<br>epidemiological<br>risk factor<br>N (% of those referred) | Exclusively<br>biological<br>risk factor<br>N (% of those referred) | Both epidemiological<br>and biological risk<br>factor<br>N (% of those referred) |
|------------------------------------------------------|-------------------------------------------|--------------------------------------------------------------------------|---------------------------------------------------------------------|----------------------------------------------------------------------------------|
| <b>Total</b>                                         | 443                                       | 42 (9%)                                                                  | 51 (12%)                                                            | 10 (2%)                                                                          |
| <b>Sex</b>                                           |                                           |                                                                          |                                                                     |                                                                                  |
| Male                                                 | 330                                       | 33 (10%)                                                                 | 30 (9%)                                                             | 6 (2%)                                                                           |
| Female                                               | 113                                       | 9 (8%)                                                                   | 21 (19%)                                                            | 4 (4%)                                                                           |
| <b>Age</b>                                           |                                           |                                                                          |                                                                     |                                                                                  |
| 0-12 years                                           | 11                                        | 0                                                                        | 0                                                                   | 0                                                                                |
| 13-19 years                                          | 200                                       | 30 (15%)                                                                 | 0                                                                   | 0                                                                                |
| 20-34 years                                          | 129                                       | 7 (5%)                                                                   | 29 (22%)                                                            | 5 (4%)                                                                           |
| 35-54 years                                          | 82                                        | 5 (6%)                                                                   | 15 (18%)                                                            | 4 (5%)                                                                           |
| 55+ years                                            | 21                                        | 0                                                                        | 7 (33%)                                                             | 1 (5%)                                                                           |
| <b>TB incidence/100.000<br/>in country of origin</b> |                                           |                                                                          |                                                                     |                                                                                  |
| <50                                                  | 33                                        | 5 (15%)                                                                  | 4(12%)                                                              | 2 (6%)                                                                           |
| 50-99                                                | 42                                        | 1 (2%)                                                                   | 7 (17%)                                                             | 2 (5%)                                                                           |
| 100-199                                              | 226                                       | 23 (10%)                                                                 | 11 (5%)                                                             | 5 (2%)                                                                           |
| 200-299                                              | 85                                        | 10 (12%)                                                                 | 16 (19%)                                                            | 1 (1%)                                                                           |
| ≥300                                                 | 53                                        | 2 (4%)                                                                   | 13 (25%)                                                            | 0                                                                                |
| Unknown                                              | 4                                         | 1 (25%)                                                                  | 0                                                                   | 0                                                                                |

TB=Tuberculosis

IGRA=Interferon gamma release assay
