# Supplementary material
Source: HighWire-hosted journal article supplement (https://erj.ersjournals.com/content/57/3/2002255)
Supplement: inline-supplementary-material-4 [file inline-supplementary-material-4.pdf]

**Appendix.4** Univariate and multivariate models for predictors of completing each cascade steps of LTBI-care after referral to TB-specialist in a review of 443 medical records for persons screening positive with IGRA in Stockholm County January 1st 2016 to December 31st 2017.

| <b>Table A4:1 Odds ratios, with 95% confidence intervals, for being invited to TB specialist clinic among those who were referred to TB specialist clinic in a review of 443 medical records in Stockholm County January 1<sup>st</sup> 2016 to December 31<sup>st</sup> 2017.</b> |                |                                                      |                          |                             |
|------------------------------------------------------------------------------------------------------------------------------------------------------------------------------------------------------------------------------------------------------------------------------------|----------------|------------------------------------------------------|--------------------------|-----------------------------|
|                                                                                                                                                                                                                                                                                    |                | <i>Number invited to TB specialist clinic(n=386)</i> | <i>Crude OR (95% CI)</i> | <i>Adjusted OR*(95% CI)</i> |
| <b>Sex</b>                                                                                                                                                                                                                                                                         |                |                                                      |                          |                             |
|                                                                                                                                                                                                                                                                                    | Male           | 291                                                  | Reference                | Reference                   |
|                                                                                                                                                                                                                                                                                    | Female         | 95                                                   | 0.71 (0.39-1.30)         | 1.33 (0.64-2.76)            |
| <b>Age</b>                                                                                                                                                                                                                                                                         |                |                                                      |                          |                             |
|                                                                                                                                                                                                                                                                                    | 0-12 years     | 9                                                    | 2.77 (0.47-16.21)        | 6.18 (0.97-39.39)           |
|                                                                                                                                                                                                                                                                                    | 13-19 years    | 191                                                  | 13.1 (4.32-39.46)        | 28.86 (7.51-110.83)         |
|                                                                                                                                                                                                                                                                                    | 20-34 years    | 115                                                  | 5.06 (1.79-14.31)        | 7.39 (2.28-23.95)           |
|                                                                                                                                                                                                                                                                                    | 35-54 years    | 58                                                   | 1.49 (0.55-4.05)         | 1.81 (0.58-5.60)            |
|                                                                                                                                                                                                                                                                                    | 55+ years      | 13                                                   | Reference                | Reference                   |
| <b>TB incidence/100.000 in country of origin</b>                                                                                                                                                                                                                                   |                |                                                      |                          |                             |
|                                                                                                                                                                                                                                                                                    | <50            | 26                                                   | 0.86 (0.29-2.55)         | 0.90 (0.27-3.02)            |
|                                                                                                                                                                                                                                                                                    | 50-99          | 38                                                   | 2.21 (0.64-7.63)         | 2.72 (0.72-10.34)           |
|                                                                                                                                                                                                                                                                                    | 100-199        | 204                                                  | 2.16 (0.95-4.89)         | 0.78 (0.28-2.14)            |
|                                                                                                                                                                                                                                                                                    | 200-299        | 71                                                   | 1.18 (0.48-2.89)         | 0.79 (0.29-2.17)            |
|                                                                                                                                                                                                                                                                                    | ≥300           | 43                                                   | Reference                | Reference                   |
|                                                                                                                                                                                                                                                                                    | Unknown        | 4                                                    | N/A                      | N/A                         |
| <b>Risk factor, biological or/and environmental</b>                                                                                                                                                                                                                                |                |                                                      |                          |                             |
|                                                                                                                                                                                                                                                                                    | No risk factor | 288                                                  | Reference                | Reference                   |
|                                                                                                                                                                                                                                                                                    | Risk factor    | 98                                                   | 3.54 (1.37-9.11)         | 6.06 (2.21-16.64)           |

\*Odds ratios adjusted for sex, age, environmental/biological risk factor and TB incidence in country of origin. As complete case analysis was used, the number of cases decreased due to missing data in incidence/100.000 in country of origin.

N/A=Not applicable

TB=Tuberculosis

OR=Odds Ratio

CI=Confidence intervals

**Table A4:2 Odds ratios, with 95% confidence intervals, for visit to the TB specialist clinic among those invited by the TB specialist in a review of 443 medical records in Stockholm County January 1<sup>st</sup> 2016 to December 31<sup>st</sup> 2017.**

|                                                         |                | <i>Number visited the TB<br/>specialist clinic(n=366)</i> | <i>Crude OR (95% CI)</i> | <i>Adjusted OR* (95% CI)</i> |
|---------------------------------------------------------|----------------|-----------------------------------------------------------|--------------------------|------------------------------|
| <b>Sex</b>                                              |                |                                                           |                          |                              |
|                                                         | Male           | 277                                                       | Reference                | Reference                    |
|                                                         | Female         | 89                                                        | 0.75 (0.28-2.00)         | 1.08 (0.36-3.23)             |
| <b>Age</b>                                              |                |                                                           |                          |                              |
|                                                         | 0-12 years     | 8                                                         | 0.67 (0.04-12.27)        | 0.76 (0.04-15.10)            |
|                                                         | 13-19 years    | 186                                                       | 3.10 (0.34-28.69)        | 3.44 (0.32-37.63)            |
|                                                         | 20-34 years    | 103                                                       | 0.72 (0.09-5.99)         | 0.74 (0.08-6.63)             |
|                                                         | 35-54 years    | 57                                                        | 4.75 (0.28-81.37)        | 4.87 (0.27-89.75)            |
|                                                         | 55+ years      | 12                                                        | Reference                | Reference                    |
| <b>TB incidence/100.000 in<br/>country of origin</b>    |                |                                                           |                          |                              |
|                                                         | <50            | 25                                                        | 1.22 (0.11-14.15)        | 1.25 (0.10-15.17)            |
|                                                         | 50-99          | 36                                                        | 0.88 (0.12-6.56)         | 0.68 (0.09-5.40)             |
|                                                         | 100-199        | 196                                                       | 1.20 (0.25-5.84)         | 0.36 (0.07-1.92)             |
|                                                         | 200-299        | 64                                                        | 0.45 (0.09-2.25)         | 0.36 (0.07-1.92)             |
|                                                         | ≥300           | 41                                                        | Reference                | Reference                    |
|                                                         | Unknown        | 4                                                         | N/A                      | N/A                          |
| <b>Risk factor, biological or/and<br/>environmental</b> |                |                                                           |                          |                              |
|                                                         | No risk factor | 264                                                       | Reference                | Reference                    |
|                                                         | Risk factor    | 93                                                        | 1.41 (0.50-3.97)         | 1.48 (0.50-4.34)             |

\*Odds ratios adjusted for sex, age, environmental/biological risk factor and TB incidence in country of origin. As complete case analysis was used, the number of cases decreased due to missing data in incidence/100.000 in country of origin.

N/A=Not applicable

TB=Tuberculosis

OR=Odds Ratio

CI=Confidence intervals

**Table A4: Odds ratios, with 95% confidence intervals, for recommended LTBI treatment after visit to the TB specialist clinic in a review of 443 medical records in Stockholm County January 1<sup>st</sup> 2016 to December 31<sup>st</sup> 2017.**

|                                                         |                | <i>Number recommended<br/>treatment(n=251)</i> | <i>Crude OR (95% CI)</i> | <i>Adjusted OR* (95% CI)</i> |
|---------------------------------------------------------|----------------|------------------------------------------------|--------------------------|------------------------------|
| <b>Sex</b>                                              |                |                                                |                          |                              |
|                                                         | Male           | 194                                            | Reference                | Reference                    |
|                                                         | Female         | 57                                             | 0.76 (0.46-1.26)         | 2.36 (1.19-4.73)             |
| <b>Age</b>                                              |                |                                                |                          |                              |
|                                                         | 0-12 years     | 4                                              | 3.00 (0.45-20.2)         | 4.27 (0.57-31.9)             |
|                                                         | 13-19 years    | 172                                            | 36.9 (8.95-152)          | 83.6 (16.6-420)              |
|                                                         | 20-34 years    | 59                                             | 4.02 (1.03-15.7)         | 6.96 (1.60-30.4)             |
|                                                         | 35-54 years    | 13                                             | 0.89 (0.21-3.76)         | 1.73 (0.37-8.10)             |
|                                                         | 55+ years      | 3                                              | Reference                | Reference                    |
| <b>TB incidence/100.000 in<br/>country of origin</b>    |                |                                                |                          |                              |
|                                                         | <50            | 12                                             | 0.97 (0.36-2.62)         | 1.29 (0.41-4.03)             |
|                                                         | 50-99          | 10                                             | 0.40 (0.16-1.05)         | 0.38 (0.12-1.19)             |
|                                                         | 100-199        | 162                                            | 5.00 (2.45-10.23)        | 1.32 (0.53-3.31)             |
|                                                         | 200-299        | 44                                             | 2.31 (1.03-5.19)         | 1.91 (0.73-5.00)             |
|                                                         | ≥300           | 20                                             | Reference                | Reference                    |
|                                                         | Unknown        | 3                                              | N/A                      | N/A                          |
| <b>Risk factor, biological or/and<br/>environmental</b> |                |                                                |                          |                              |
|                                                         | No risk factor | 169                                            | Reference                | Reference                    |
|                                                         | Risk factor    | 61                                             | 1.11 (0.69-1.79)         | 1.63 (0.87-3.05)             |

\*Odds ratios adjusted for sex, age, environmental/biological risk factor and TB incidence in country of origin. As complete case analysis was used, the number of cases decreased due to missing data in incidence/100.000 in country of origin.

N/A=Not applicable

TB=Tuberculosis

OR=Odds Ratio

CI=Confidence intervals

LTBI=Latent tuberculosis infection

**Table A4:4 Odds ratios, with 95% confidence intervals, for initiated LTBI treatment after treatment recommendation in a review of 443 medical records in Stockholm County January 1<sup>st</sup> 2016 to December 31<sup>st</sup> 2017.**

|                                                         |                | <i>Number initiated<br/>treatment(n=244)</i> | <i>Crude OR (95% CI)</i> | <i>Adjusted OR* (95% CI)</i> |
|---------------------------------------------------------|----------------|----------------------------------------------|--------------------------|------------------------------|
| <b>Sex</b>                                              |                |                                              |                          |                              |
|                                                         | Male           | 191                                          | Reference                | Reference                    |
|                                                         | Female         | 53                                           | 0.21 (0.05-0.96)         | 0.45 (0.06-3.16)             |
| <b>Age</b>                                              |                |                                              |                          |                              |
|                                                         | 0-12 years     | 4                                            | N/A                      | N/A                          |
|                                                         | 13-19 years    | 172                                          | N/A                      | N/A                          |
|                                                         | 20-34 years    | 53                                           | N/A                      | N/A                          |
|                                                         | 35-54 years    | 12                                           | N/A                      | N/A                          |
|                                                         | 55+ years      | 3                                            | Reference                | Reference                    |
| <b>TB incidence/100.000 in<br/>country of origin</b>    |                |                                              |                          |                              |
|                                                         | <50            | 10                                           | 0.26 (0.02-3.27)         | 0.15 (0.01-2.58)             |
|                                                         | 50-99          | 10                                           | N/A                      | N/A                          |
|                                                         | 100-199        | 161                                          | 8.47 (0.51-141.07)       | 1.20 (0.06-22.81)            |
|                                                         | 200-299        | 42                                           | 1.11 (0.09-12.95)        | 0.57 (0.04-7.73)             |
|                                                         | ≥300           | 19                                           | Reference                | Reference                    |
|                                                         | Unknown        | 2                                            | N/A                      | N/A                          |
| <b>Risk factor, biological or/and<br/>environmental</b> |                |                                              |                          |                              |
|                                                         | No risk factor | 164                                          | Reference                | Reference                    |
|                                                         | Risk factor    | 59                                           | 1.22 (0.23-6.42)         | 2.51 (0.36-17.62)            |

\*Odds ratios adjusted for sex, age, environmental/biological risk factor and TB incidence in country of origin. As complete case analysis was used, the number of cases decreased due to missing data in incidence/100.000 in country of origin.

N/A=Not applicable

OR=Odds Ratio

CI=Confidence intervals

TB=tuberculosis

LTBI=Latent tuberculosis infection

**Table A4:5 Odds ratios, with 95% confidence intervals, for completed treatment after LTBI treatment initiation in a review of 443 medical records in Stockholm County January 1<sup>st</sup> 2016 to December 31<sup>st</sup> 2017.**

|                                                         |                | <i>Number completed<br/>treatment(n=221)</i> | <i>Crude OR (95% CI)</i> | <i>Adjusted OR* (95% CI)</i> |
|---------------------------------------------------------|----------------|----------------------------------------------|--------------------------|------------------------------|
| <b>Sex</b>                                              |                |                                              |                          |                              |
|                                                         | Male           | 174                                          | Reference                | Reference                    |
|                                                         | Female         | 47                                           | 1.31 (0.49-3.50)         | 0.16 (0.02-1.68)             |
| <b>Age</b>                                              |                |                                              |                          |                              |
|                                                         | 0-12 years     | 4                                            | N/A                      | N/A                          |
|                                                         | 13-19 years    | 162                                          | N/A                      | N/A                          |
|                                                         | 20-34 years    | 44                                           | N/A                      | N/A                          |
|                                                         | 35-54 years    | 8                                            | N/A                      | N/A                          |
|                                                         | 55+ years      | 3                                            | Reference                | Reference                    |
| <b>TB incidence/100.000 in<br/>country of origin</b>    |                |                                              |                          |                              |
|                                                         | <50            | 8                                            | 0.70 (0.11-4.48)         | N/A                          |
|                                                         | 50-99          | 7                                            | 1.20 (0.22-6.53)         | 3.88 (0.20-74.46)            |
|                                                         | 100-199        | 150                                          | 0.21 (0.06-0.68)         | 0.22 (0.01-3.78)             |
|                                                         | 200-299        | 40                                           | 0.14 (0.02-0.81)         | 0.41 (0.03-6.58)             |
|                                                         | ≥300           | 14                                           | Reference                | Reference                    |
|                                                         | Unknown        | 2                                            | N/A                      | N/A                          |
| <b>Risk factor, biological or/and<br/>environmental</b> |                |                                              |                          |                              |
|                                                         | No risk factor | 154                                          | Reference                | Reference                    |
|                                                         | Risk factor    | 47                                           | 2.74 (1.11-6.76)         | 2.23 (0.51-9.68)             |

\*Odds ratios adjusted for sex, age, environmental/biological risk factor and TB incidence in country of origin. As complete case analysis was used, the number of cases decreased due to missing data in incidence/100.000 in country of origin.

N/A=Not applicable

OR=Odds Ratio

CI=Confidence intervals

LTBI=Latent tuberculosis infection

TB=Tuberculosis
