# Supplementary material
Source: HighWire-hosted journal article supplement (https://erj.ersjournals.com/content/57/3/2002255)
Supplement: inline-supplementary-material-5 [file inline-supplementary-material-5.pdf]

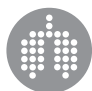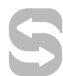

SHAREABLE PDF

# Evaluation of the latent tuberculosis screening and treatment strategy for asylum seekers in Stockholm, Sweden 2015–2018: a record linkage study of the care cascade

Joanna Nederby Öhd<sup>1,2</sup>, Maria-Pia Hergens<sup>1,2,3</sup>, Yauheni Luksha<sup>4</sup>, Charlotte Buxbaum<sup>5</sup>, Jad Shedrawy<sup>1</sup>, Jerker Jonsson<sup>6</sup>, Judith Bruchfeld<sup>3,4</sup> and Knut Lönnroth<sup>1</sup>

**Affiliations:** <sup>1</sup>Dept of Global Public Health, Karolinska Institutet, Stockholm, Sweden. <sup>2</sup>Dept of Communicable Disease Prevention and Control, Stockholm Region, Sweden. <sup>3</sup>Division of Infectious Diseases, Dept of Medicine Solna, Karolinska Institutet, Stockholm, Sweden. <sup>4</sup>Dept of Infectious Diseases, Karolinska University Hospital Solna, Stockholm, Sweden. <sup>5</sup>Astrid Lindgren Children's Hospital, Karolinska University Hospital Huddinge, Stockholm, Sweden. <sup>6</sup>Dept of Public Health Analysis and Data Management, Unit for Epidemiological Monitoring, Public Health Agency of Sweden, Solna, Sweden.

**Correspondence:** Joanna Nederby Öhd, Dept of Global Public Health, Karolinska Institutet, Solnavägen 1, 171 77 Solna, Stockholm, Sweden. E-mail: joanna.nederby-ohd@sl.se

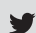

@ERSpublications

The Stockholm Region voluntary latent tuberculosis migrant screening programme shows high participant compliance. However, of 1364 IGRA positive subjects (n=5470) only 358 initiated treatment, primarily due to current conservative local treatment policies <https://bit.ly/3aAFoIE>

**Cite this article as:** Nederby Öhd J, Hergens M-P, Luksha Y, *et al.* Evaluation of the latent tuberculosis screening and treatment strategy for asylum seekers in Stockholm, Sweden 2015–2018: a record linkage study of the care cascade. *Eur Respir J* 2021; 57: 2002255 [<https://doi.org/10.1183/13993003.02255-2020>].

This single-page version can be shared freely online.

## ABSTRACT

**Introduction:** About 90% of active tuberculosis (TB) cases in Sweden are foreign born and are mainly due to latent TB infection (LTBI) reactivation. The aim of this study was to assess the current migrant LTBI screening programme with regards to test results and completion of the care cascade.

**Method:** A retrospective cohort of all 14173 individuals attending a health examination was established for the Stockholm Region 2015–2018 through record-linkage of data extracted from the Swedish Migration Authority and medical records. Screening results, referrals to specialist care and treatment initiation were ascertained through automated data extraction for the entire cohort. Detailed cascade steps, including treatment completion, were analysed through manual data extraction for a subsample of all persons referred to specialist care in the period 2016–2017.

**Results:** Of 5470 patients screened with an interferon-gamma release assay (IGRA), 1364 (25%) were positive, of whom 358 (26%) initiated LTBI treatment. An increased trend in IGRA-positivity was seen for increased age and TB-incidence in country of origin. Among the IGRA positive patients, 604 (44%) were referred to specialist care. Lower age was the main referral predictor. In the subsample of 443 patients referred to specialist care in 2016–2017, 386 (87%) were invited, of whom 366 (95%) attended. Of 251 patients (69%) recommended for LTBI treatment, 244 (97%) started such treatment and of those 221 (91%) completed it.

**Conclusion:** The low attrition in patient-dependent cascade steps shows that the voluntary approach works well. Low LTBI treatment attainment is due to the current conservative local treatment policy, which means the vast majority are IGRA-tested without an intention to treat for LTBI.
